# Supplementary material for: An anaerobic mitochondrion that produces hydrogen
Source: Springer Nature journal article supplement (doi:10.1038/nature03343), 2005-03-01
Supplement: 41586_2005_BFnature03343_MOESM1_ESM.pdf [file 41586_2005_BFnature03343_MOESM1_ESM.pdf]

# Supplementary material

Boxma et al. / manuscript 2004-08-23120

## Contents:

1. Phylogenetic analysis
2. Bioinformatic analysis
3. Supplementary phylogenetic trees
4. Identification of poorly conserved homologues of NAD 2 and NAD 4L
5. Supplementary data on quinone determination
6. Light microscopy
7. Table 1: Genes encoding mitochondrial proteins of *N. ovalis*

## 1. Phylogenetic analysis

Alignments of the representative protein sequences were constructed using ClustalW<sup>1</sup> and Muscle<sup>2</sup>. Unequivocally aligned positions were selected either with Gblocks<sup>3</sup>, or the most reliably aligned regions were selected manually with the help of Seaview<sup>4</sup>. Phylogenies were subsequently derived using two methods 1) Maximum Likelihood (ML) as implemented in MrBayes<sup>5</sup> using four gamma-distributed rate categories plus invariant positions and the Poisson amino acid similarity matrix, and 2) neighbour joining (NJ)<sup>6</sup> as implemented in ClustalW<sup>1</sup>, correcting for multiple substitutions using the Gonnet amino acids identity matrix<sup>7</sup>, and bootstrapping from 100 samples. The topologies shown in the figure correspond to the ML approach, and the values on the nodes indicate the posterior probability for the partition (ML) and its bootstrap value (NJ) respectively. Bootstrap values have been only indicated for the partitions that were retrieved by both methods and that were higher than 50%.

## 2. Bioinformatic analysis

Open reading frames with a lower size limit of 100 nucleotides were identified with ORF Finder (<http://www.ncbi.nlm.nih.gov/gorf/gorf.html>).

tRNAs were identified with tRNAscan-SE

(<http://www.genetics.wustl.edu/eddy/tRNAscan-SE/>)<sup>8</sup>

Potential mitochondrial import signals were detected with the network service MITOP (<http://mips.gsf.de/cgi-bin/proj/medgen/mitofilter>)<sup>9</sup>

Sequence similarity searches of deduced amino acid sequences were performed with BLASTX (<http://www.ncbi.nlm.nih.gov/BLAST/>)<sup>10</sup>

The nucleotide sequence similarity searches were conducted with BLASTN and FASTA

For the identification of potential mitochondrial genes a reciprocal Smith-Waterman sequence comparison was performed between the six-frames translated gDNA library of *N. ovalis* and the yeast and human mitochondrial proteins. Significant (e-value = 0.01) best bi-directional hits between both sets were selected.

1. Jeanmougin, F., Thompson, J.D., Gouy, M., Higgins, D.G. & Gibson, T.J. Multiple sequence alignment with Clustal X. *Trends Biochem. Sci.* **23**, 403-405 (1998).
2. Edgar, R.C. MUSCLE: multiple sequence alignment with high throughput and high accuracy. *Nucleic Acids Res.* **32**, 1792-1797 (2004).
3. Castresana, J. Selection of conserved blocks from multiple alignments for their use in phylogenetic analysis. *Mol Biol Evol* **17**, 540-552 (2000).
4. Galtier, N., Gouy, M. & Gautier, C. SeaView and Phylo\_win, two graphic tools for sequence alignment and molecular phylogeny. *Comput. Applic. Biosci.* **12**, 543-548 (1996).
5. Huelsenbeck, J.P. & Ronquist, F. MRBAYES: Bayesian inference of phylogenetic trees. *Bioinformatics* **17**, 754-755 (2001).
6. Saitou, N. & Nei, M. The neighbor-joining method: a new method for reconstructing phylogenetic trees. *Mol. Biol. Evol.* **4**, 406-425 (1987).

7. Gonnet G.H., Cohen M.A. & Benner S.A. Exhaustive matching of the entire protein sequence database. *Science* **256**(5062), 1443-1445 (1992).
8. Lowe, T.M. & Eddy, S.R. tRNAscan-SE: a program for improved detection of transfer RNA genes in genomic sequence. *Nucl. Acids Res.* **25**, 955-964 (1997).
9. M.G. Claros & Vincens, P. Computational method to predict mitochondrially imported proteins and their targeting sequences. *Eur. J. Biochem.* **241**, 779-786 (1996).
10. Gish, W. & States, D.J. Identification of protein coding regions by database similarity search. *Nature Genet.* **3**, 266-272 (1993).

### Supplementary phylogenetic trees

The phylogenies were derived using MrBayes and neighbour joining (only Figs 6-10): the topologies correspond to the ML (MrBayes) approach, and the values at the nodes indicate the posterior probability for the partition and its bootstrap value, respectively.

Only values, which are higher than 50% are indicated.

H: encoded by the hydrogenosomal genome

N: nuclear-encoded

Only novel accession numbers are indicated in the legends (except those of *N. ovalis*, strain *Blaberus* spec. Amsterdam, which are displayed in Table 1)

Fig. S1: Nad5 of mitochondrial complex I (H)

Fig. S2: RPL2, mitochondrial ribosomal protein L2 (H)

Fig. S3: RPL14, mitochondrial ribosomal protein L14 (H)

Fig. S4: RPL 20, mitochondrial ribosomal protein L20 (N)

Fig. S5: 75 kD subunit of mitochondrial complex I (N)

Fig. S6: PDH E1a, pyruvate dehydrogenase subunit E1 alpha (N)

Fig. S7: PDH E1b, pyruvate dehydrogenase subunit E1 beta (N)

Fig. S8: PDH E2, pyruvate dehydrogenase subunit E2 (N)

Fig. S9: SDHa, succinate dehydrogenase subunit A (Fp) of mitochondrial complex II (N)

Fig. S10: SDHb, succinate dehydrogenase subunit B (Ip) of mitochondrial complex II (N)

Fig. S11: 24 kD subunit of mitochondrial complex I "24 kD" module of the hydrogenase (N)

Fig. S12: 51 kD subunit of mitochondrial complex I "51 kD" module of the hydrogenase (N)

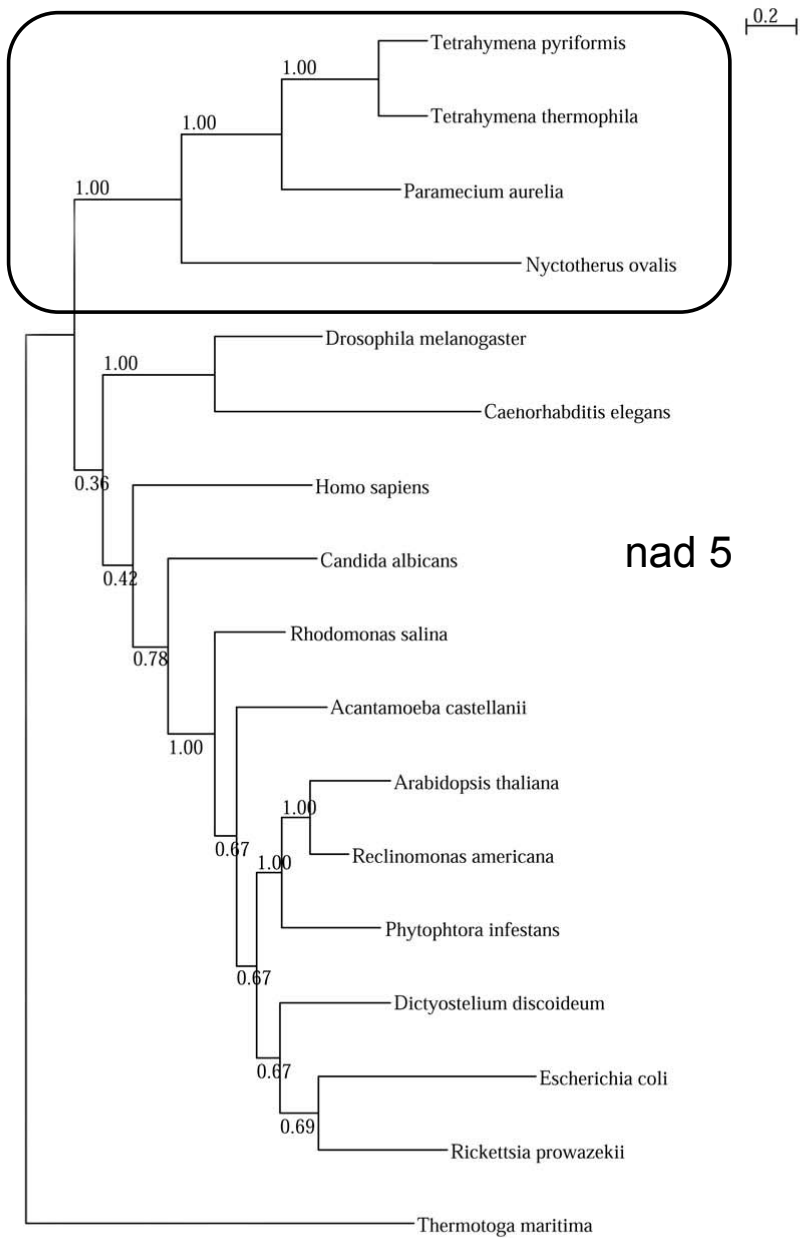

Fig. S1: Nad5 of mitochondrial complex I (H). Box: ciliate sequences

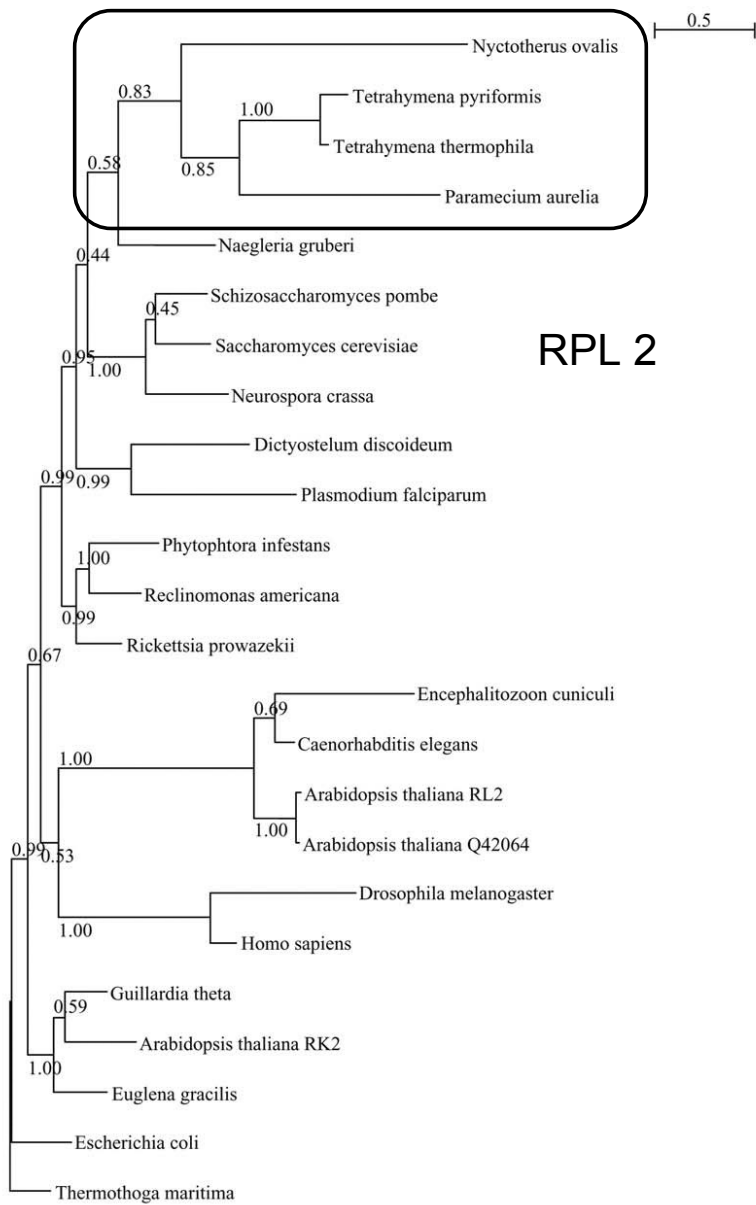

Fig. S2: RPL2, mitochondrial ribosomal protein L2 (H). Box: ciliate sequences

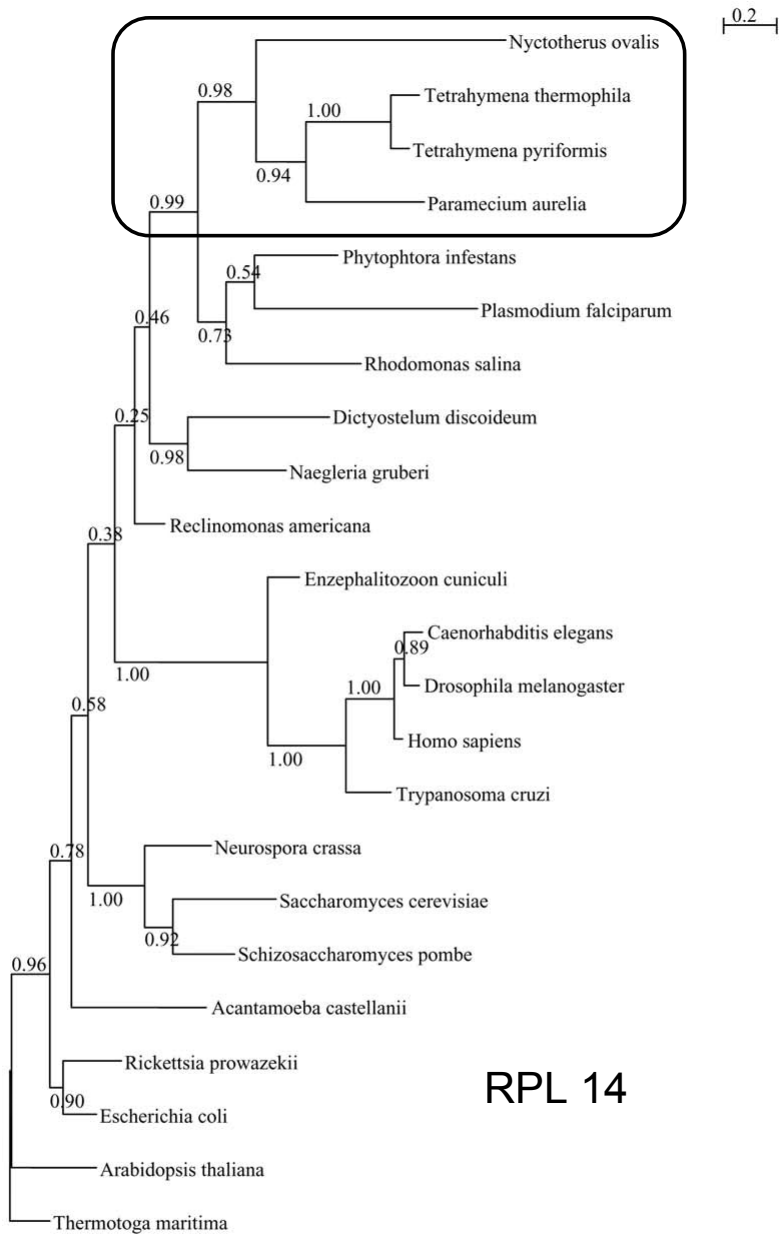

Fig. S3: RPL14, mitochondrial ribosomal protein L14 (H). Box: ciliate sequences

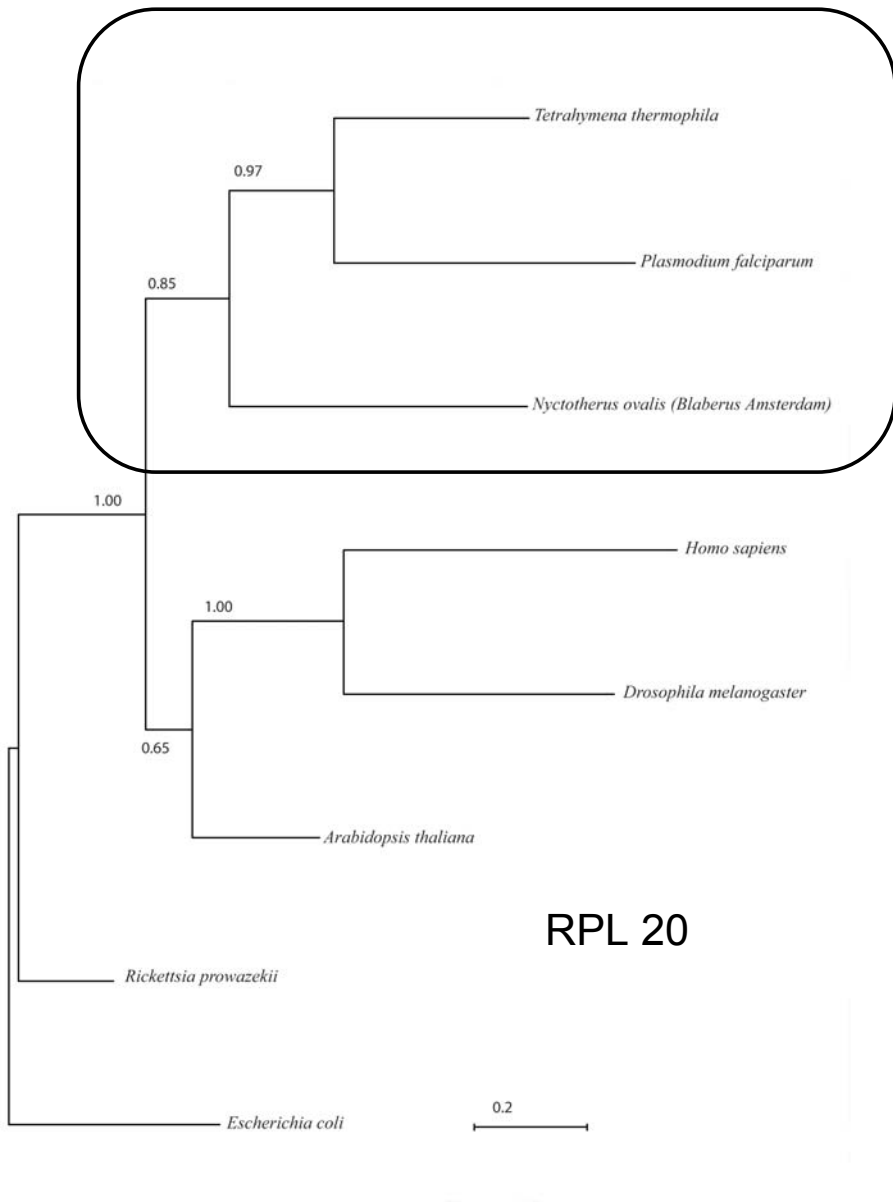

Fig. S4: RPL 20, mitochondrial ribosomal protein L20 (N).  
 Box: Alveolates (Ciliates plus Apicomplexans)

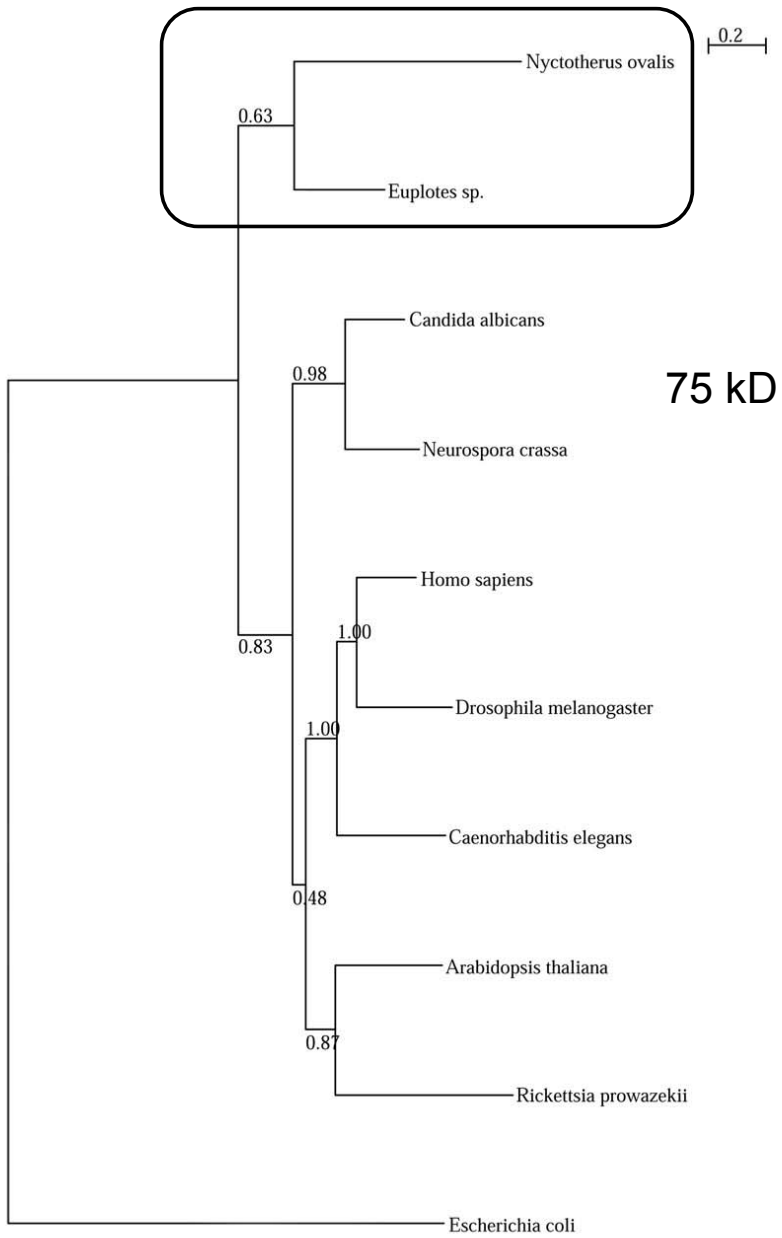

Fig. S5: 75 kD subunit of mitochondrial complex I (N). Box: ciliate sequences, Acc.nr. *Euplotes sp.* (\*\*\*\*\*)



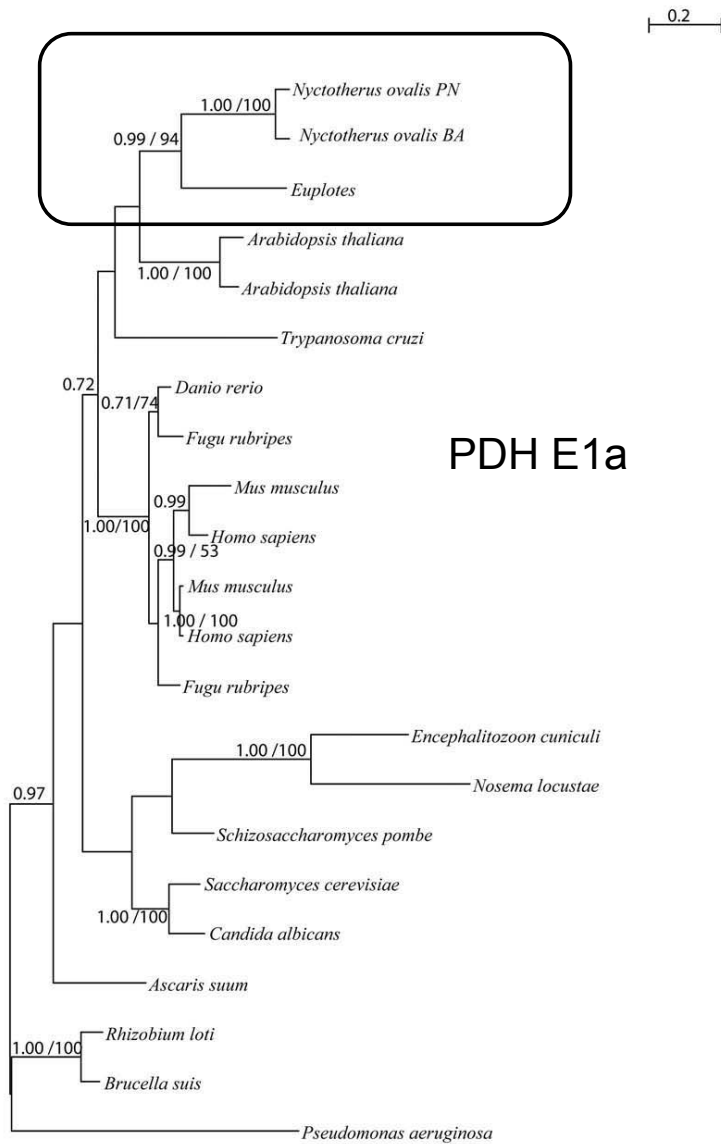

Fig. S6: PDH E1a, pyruvate dehydrogenase subunit E1 alpha (N).

Box: ciliate sequences,

*Nyctotherus ovalis PN*: strain *Periplaneta americana* Nijmegen (AY623923)

*Euplotes*: *Euplotes spec.* (AY623916)

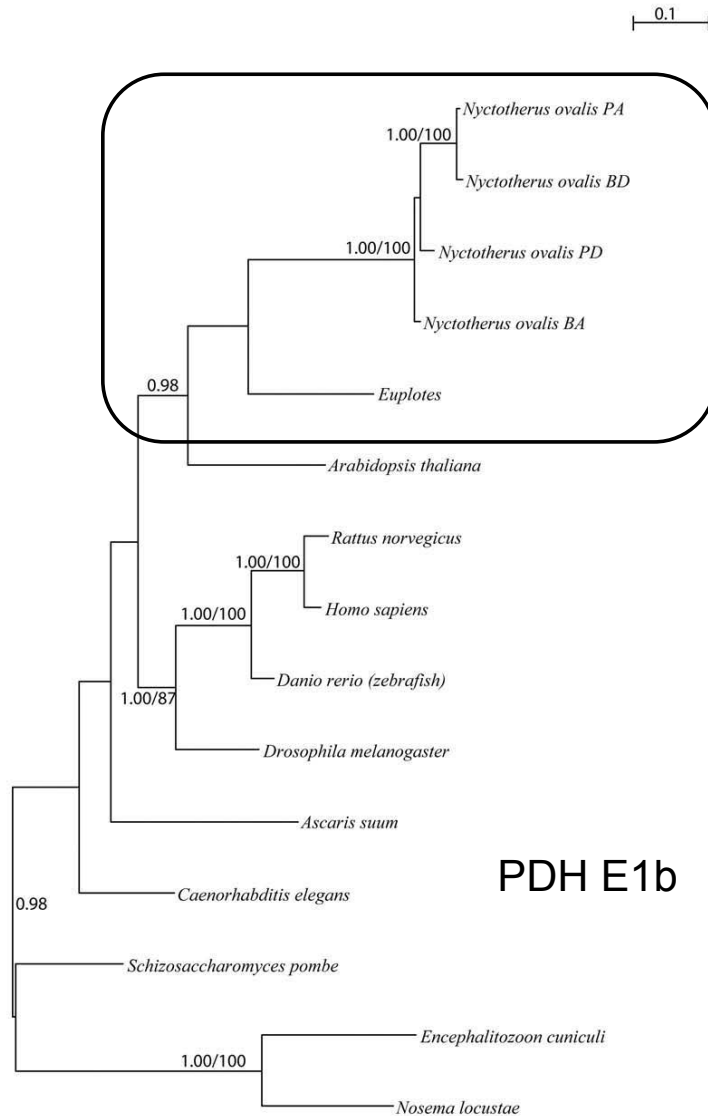

Fig. S7: PDH E1b, pyruvate dehydrogenase subunit E1 beta (N)

Box: ciliate sequences,

*Nyctotherus ovalis* BD, strain *Blaberus* spec. Düsseldorf (AY628685)

*Nyctotherus ovalis* PA, strain *Periplaneta americana* Amsterdam (AY628686)

*Nyctotherus ovalis* PD, strain *Periplaneta americana* Dar-es-salaam (AY628687)

*Euplotes* sp.(AY628682)

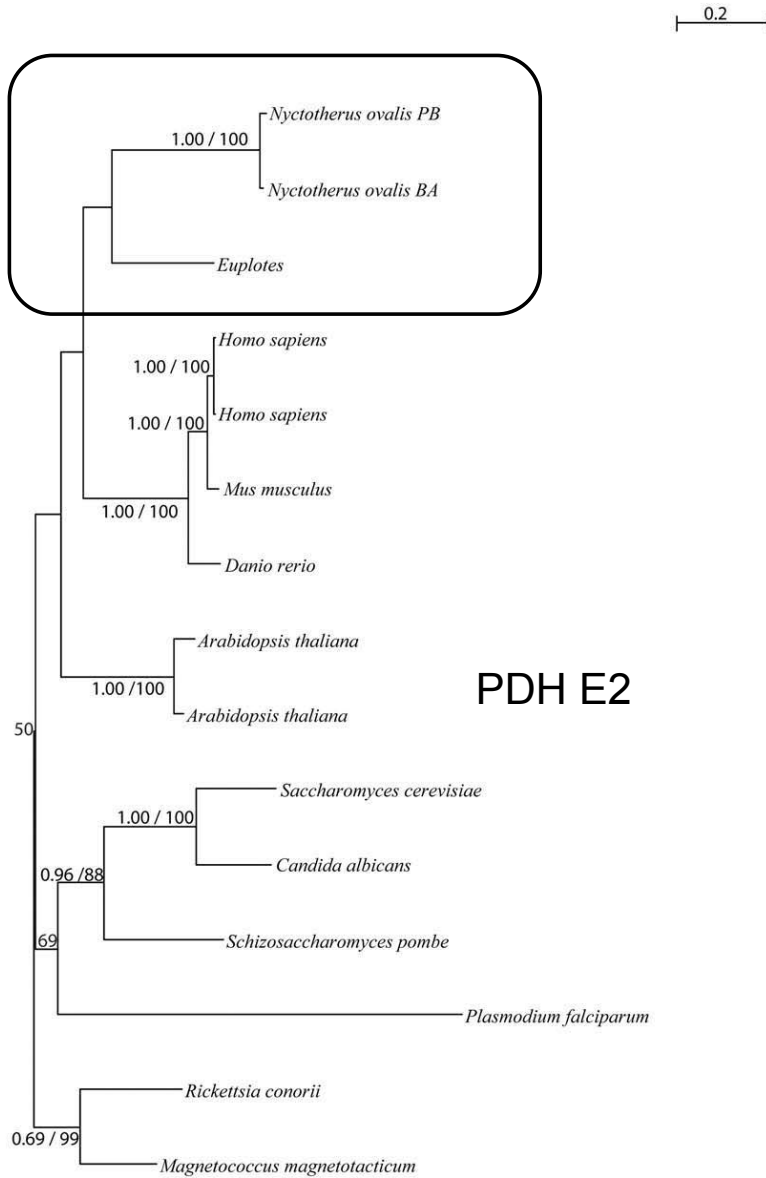

Fig. S8: PDH E2, pyruvate dehydrogenase subunit E2 (N),  
 Box: ciliate sequences,  
*Nyctotherus ovalis PB*, strain *Periplaneta americana* Bayer (AY623927)  
*Euplotes sp.* (AY623924)

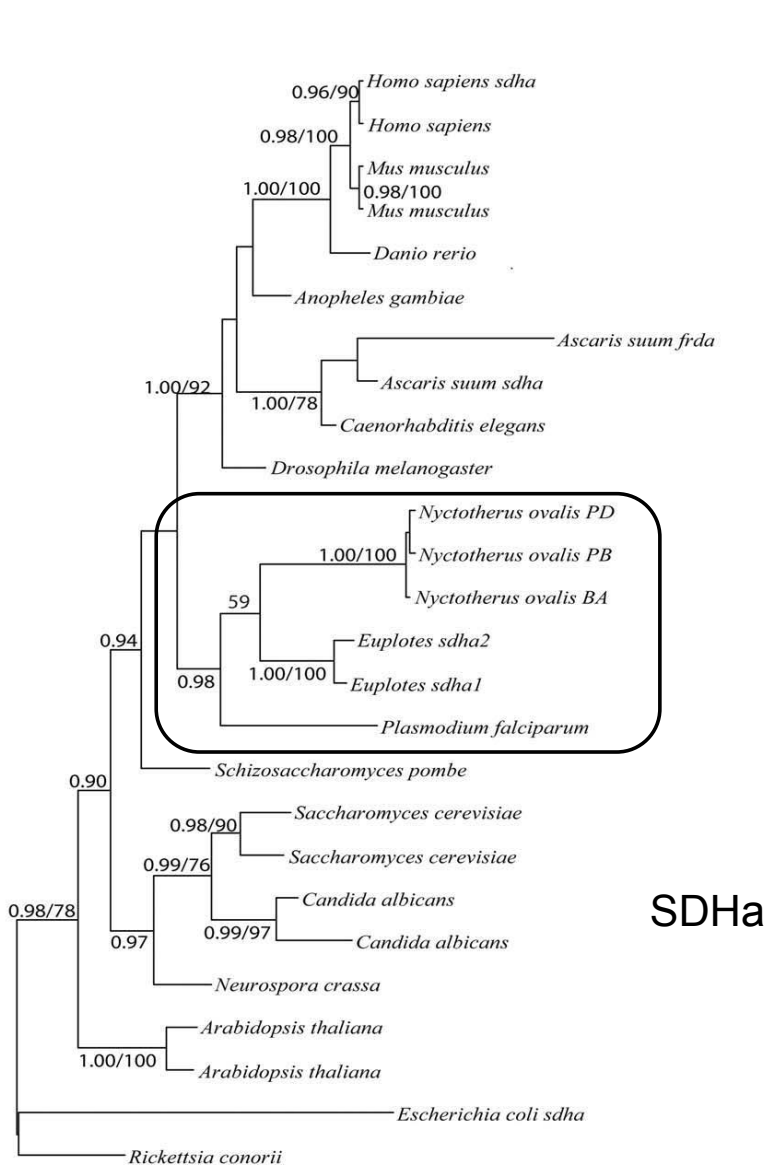

Fig. S9: SDHa, succinate dehydrogenase subunit A (Fp) of mitochondrial complex II (N)  
 Box: Alveolates (Ciliates plus Apicomplexans)  
*Nyctotherus ovalis PB*, strain *Periplaneta americana* Bayer (AY616153)  
*Nyctotherus ovalis PA*, strain *Periplaneta americana* Amsterdam (AY616154)  
*Nyctotherus ovalis BD*, strain *Blaberus* spec. Düsseldorf (AY616155)  
*Nyctotherus ovalis PD* strain *Periplaneta americana* Dar-es-salaam (AY616156)  
*Euplotes* sp. SDHa1 (AY616157)  
*Euplotes* sp. SDHa2 (AY616158)

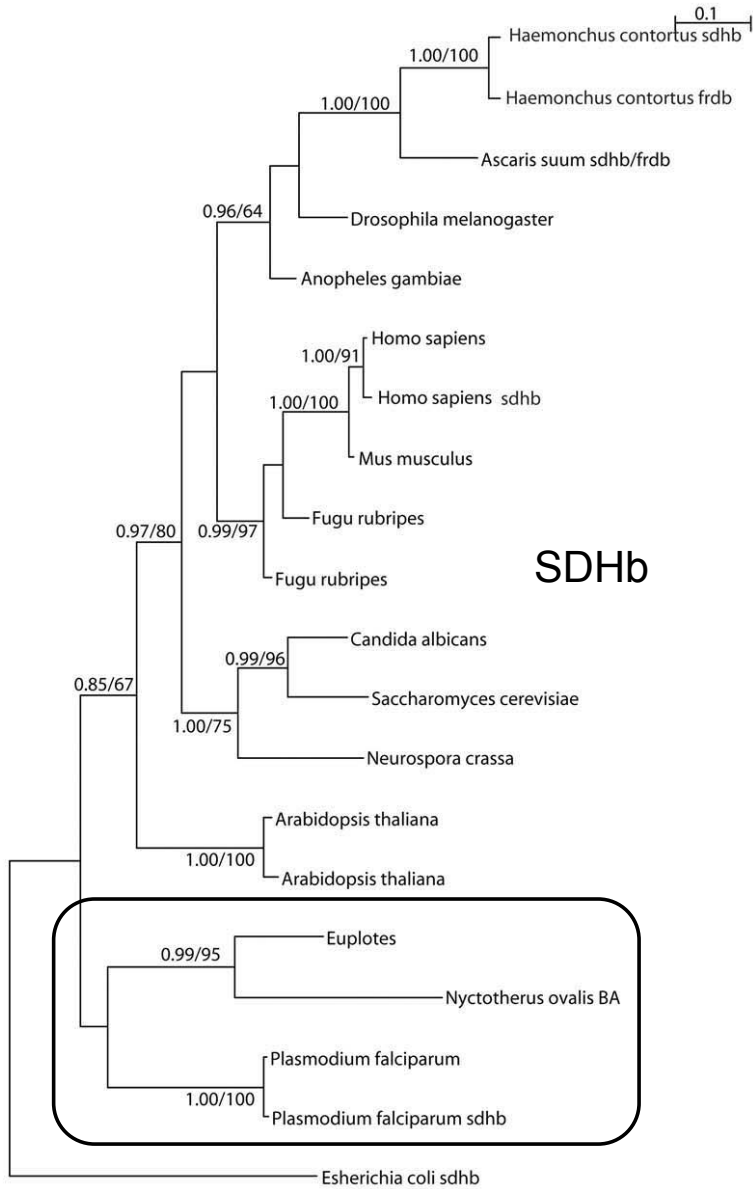

Fig. S10: SDHb, succinate dehydrogenase subunit B (Ip) of mitochondrial complex II (N)  
 Box: Alveolates (Ciliates plus Apicomplexans)  
*Euplotes* sp.(AY619984)

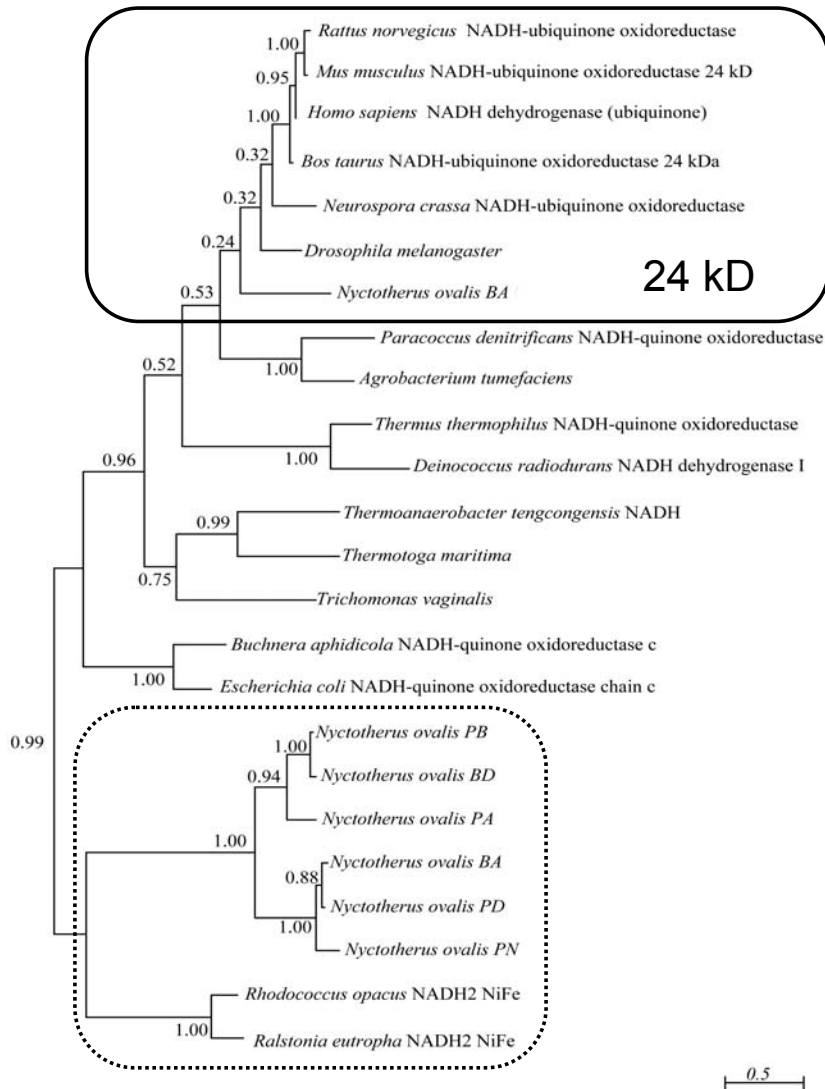

Fig. S11: 24 kD subunit of mitochondrial complex I/"24 kD" module of the hydrogenase (N)  
 Box with solid line: 24 kD subunits of mitochondrial complex I  
 Box with dotted line: hydrogenase modules  
*Nyctotherus ovalis BD*, strain *Blaberus* spec. Düsseldorf (AY608628)  
*Nyctotherus ovalis PA*, strain *Periplaneta americana* Amsterdam (AY608629)  
*Nyctotherus ovalis PB*, strain *Periplaneta americana* Bayer (AY608630)  
*Nyctotherus ovalis PD*, strain *Periplaneta americana* Dar-es-salaam (AY608631)  
*Nyctotherus ovalis PN*, strain *Periplaneta americana* Nijmegen

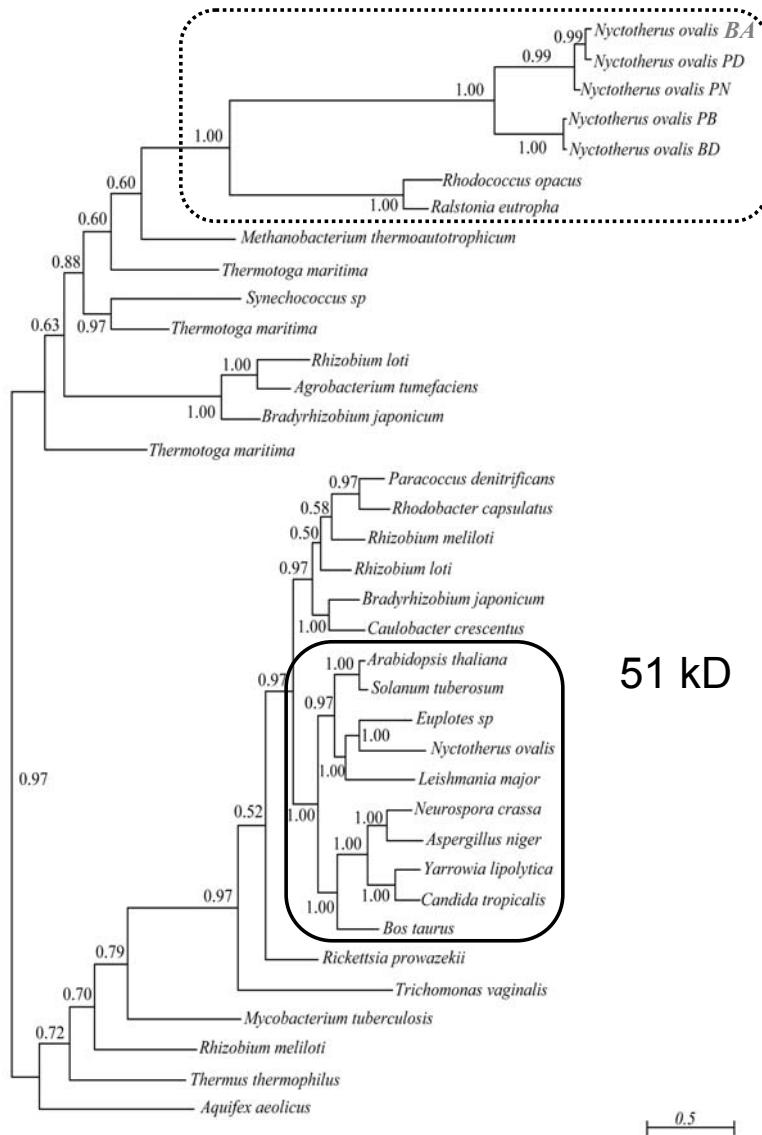

Fig. S12: 51 kD subunit of mitochondrial complex I "51 kD" module of the hydrogenase (N)  
 Box with solid line: 51 kD subunits of mitochondrial complex I  
 Box with dotted line: hydrogenase modules  
*Nyctotherus ovalis* PA, strain *Periplaneta americana* Amsterdam (AY608635)  
*Euplotes* sp. (AY608636)  
*Nyctotherus ovalis* BD, strain *Blaberus* spec. Düsseldorf (AY608628)  
*Nyctotherus ovalis* PB, strain *Periplaneta americana* Bayer (AY608630)  
*Nyctotherus ovalis* PD, strain *Periplaneta americana* Dar-es-salaam (AY608631)  
*Nyctotherus ovalis* PN, strain *Periplaneta americana* Nijmegen

#### **4. Identification of poorly conserved homologues of NAD 2 and NAD 4L**

The organelle encoded ORFs potentially encoding NAD 2 and NAD 4L, have been analysed according to Brunk, C. F., Lee, L. C., Tran, A. B. & Li, J. Complete sequence of the mitochondrial genome of *Tetrahymena thermophila* and comparative methods for identifying highly divergent genes. *Nucleic Acids Res.* **31**, 1673-1682 (2003).

For NAD 2, four TM domains have been identified, i.e. *T. pyriformis* 20-42, 62-82, 99-116, 137-159; *T. thermophila* 15-37, 58-80, 95-114, 135-157; *N. ovalis* 15-37, 59-60, 95-117, 140-162. For NAD 4L, there are 3 TM domains, i.e. *T. pyriformis* 4-21, 26-48, 58-80; *T. thermophila* 4-21, 26-48, 58-80; *N. ovalis* 2-19, 26-48, 58-80. These data clearly support our interpretation.

For the alignments see the following pages.



# Fig. S13: CLUSTAL X (1.4b) MULTIPLE SEQUENCE ALIGNMENT

File: /mnt/cammsa20/comics/jagabald/HYDROGENOME/FIRST/aln2.ps

Date: Fri Oct 8 17:21:54 2004

Page 1 of 2

```
mad2_N -----MNFLLTIFENDIKVLFPELFLTISILALLMVGVVYSTSSHEDNPIIRATGWLSTIQILFLTILLIN-NPIHN--QVFMNNLLVADYFGLITKIVLLISSSIAIISFDYIKKERINSFEYMVVLVLLGTLGMLLITSSYDLMSMYLA
idopsi MKAEFVRIILPHMFLAVSPEIFIINATSILLIHGVVFTSKKYDYPPLASNVGWLGLLSVLITLILLAAAGAPLLITIAHLFWNNLFRDRNFTYFCQIFLLISTAGTISMCFDSSDQERFDAFEFIVLPLPTRGMLFMISAHDLIAMYLA
.pyrif
a_ther
ettisia -----MLLLLPEITLT-----LIALLGQCFALMIPNKNRIIYNIVILLCIISIFLTFKYSSY-----EGIWHSFATERNIGISKSIIILLFTIVSLIIYRDYSILVGETLKFEFITLMLLSIVGIFVAITSSRNFLLLFCG
.aurel
E_coli -----MDVTPLMRVDGFAMILYTGLVLLASLATCTFAYPWLEGYNDNKDEFYLLVLLIAALGGILLANATTWRSFLFG
.sapie
8_NAD2 -----MNPAAQPVLYSTIFAGTLITALSSHWFFTWVG
ruler 1.....10.....20.....30.....40.....50.....60.....70.....80.....90.....100.....110.....120.....130.....140.....150.
```

```
mad2_N AIEFQSLCLYVLAAFKRNSLFSVEAGLYKVFVLAGAFSSGIMLFGISILYGFVGTGFEDLGLKLLIFSSNESLSSSGIILGIVFISVGLLFKIYAVPFHVWVDPVYQGSPTIVTAFFAIVPSISVLTLLTRLYSSVLHDLIQYWQPVFIFCS
idopsi AIEFQSLCFYVIAASKRKSEFSTEAGSKYLILGAFSSGILLFGCSMIYGSTGATHFDQLAKILTGYEITGARSS-GIFMGILSIAVGLFLKITA VPFHMWAPDIYEGSPTPVTAFLSIAPKISISANILR--VSIYGSYGATLQQIFFFCS
.pyrif
a_ther
ettisia CMELTALTSYALAGFKLNDIKSSEGALKYFILGSLVSCSLFGISIFTYFGGSIQFDDILHQLN--NDSEIKR-GLIIGIVLFLSSIFPKLASSPLHFVIPDVYEGSPISSVITYFTAASKIGMVIVLLNISKLLIIGNYYPINYNLIKIIA
.aurel
E_coli GIELISLPLFGLVGYAFRQKRSLEASIKYITLSAAASSFLFGMALVYAOAGDLSFVALGKNLG---DGMLNDALLAGFGLMIVGLGFKLSLVPFHLWTPDVYQGAPAPVSTFLATASKIATFGVVMRLFLYAPVGDSEQVRRGAGDYR
.sapie
8_NAD2 GLEMNMLAFIPVLTKKLNP-RSTEAAIKYFLTQATASMILLMAILFNNMMSGQWAMTNTTINYS-----SLMIMMAMAM-----KLGMAFFHFVWPEVVTGTPLTSGLLLTWQKLAFISIMYQ-----ISPSSLNVSLLLTLS
ruler .....160.....170.....180.....190.....200.....210.....220.....230.....240.....250.....260.....270.....280.....290.....300.
```

```
mad2_N SIASMLIGSLGALSQRRIKRLIAYSAGHVGYVLLIATSTGTP--EGIRGLLVYIVYIIMSACFFTILLSLRKRENTQIVMIDELRALYKSNPILSLTIAIVLFSMAGIPPLAGFFSKLYVFLPALHEGLFLLVVVVGIASVISAIVYYLQ
idopsi SIASMLIGALAAQAQTRVKRPLAHSSIGHVGYIRTFGFCGTI--EGIQSLLIGIFTYALMTDFAFIVSALR---QTRVKYLADLGA LAKTNPISAITFSITMFSYAGIPPLAGFCCKFYLFFAALGCGAYFLAPVGVVTSVIGRFYYLR
.pyrif -----MSVFNNVWINNDLNS-----YGLSILLNINILNYLIVFMLIISIILITDI--SKFKSLNQKFEFNSYN-FILYSLIFSLLSMAGIPPLGFTGKFLAAILFSVFKSQYILLIFMTIILNIFGMFYFIQ
a_ther -----SIFSNWINNDLNS-----YGLSILLNININILNYLIVFMLIISVILLTN--SKFKSLNQKFEFNSYN-FILYSLIFSLLSMAGIPPLGFTGKFLAAILYSSFKSQY-LLIFMTIILNIFGMFYFIQ
ettisia AILSMLFGAFGAIROTSLKRLMAYSTIINIGYVLTGVLLHNQ--EGYKAALLYILYAVVSI GFFTCLIMLFG--KDVNDNASFKTIEGTAETHKTAALISIVMFSMIGIPPLTGFFGKYLLFYQAINKKEFTIAYCGIFTSVVAIFYLLK
.aurel -----MRAHLHCELAFSFGKYFYSTSFLNLLMINLMFS-----KLGALFFLNALYLLAALFFFLEFNK---VALLKMSVQIYYFNIF-FFKFFVLIFFLNLAGIPPLGFFLFLFFLFFKTNLAFILIFLGFNMAITFFYLS
E_coli RFASITIFGNLMAISQTNIKRLLGYSSISHLGYLLVALIAIQTGEMSMEAVGVYLAGYLFSSIGAFGVVSLMSSPYRGPDADSLFSYRGLFWHRPILAAVMTVMMLSLAGIPMTLGFIGKFYVLAAGVQAHLWLVGAVVVGSAIGLYYYLR
.sapie SILSINMAGSWGGLNQTLRKILAYSSITHMGWMMAVLPY-----NPNMTIILNLTYYIILTTAFLLINLNS--S-TTTLLSRTWNKLT-WLTPLIPSTLLSLGGLPPLTGFLPKWAIIEEFTKNNSLIIPMTIATITLLNLYFYLR
8_NAD2 -----MHIYSMMSLLE-----QYVTLIALHVLGYVLAGTLLIYLLSQVI-----TTNTVFLNALGHDM-LIRTCLLICLSSMAGLPPVLGFWTKLYLLLVGSFNGNMTLIIIMSLMMLVGLIYYIV
ruler .....310.....320.....330.....340.....350.....360.....370.....380.....390.....400.....410.....420.....430.....440.....450.
```

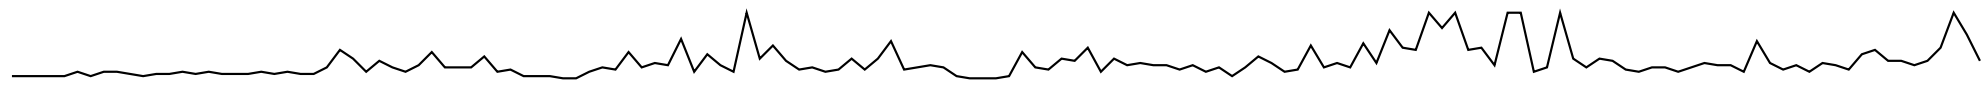

# CLUSTAL X (1.4b) MULTIPLE SEQUENCE ALIGNMENT

File: /mnt/cammsa20/comics/jagabald/HYDROGENOME/FIRST/aln2.ps

Date: Fri Oct 8 17:21:54 2004

Page 2 of 2

```
nad2_N  GLIKIMYFDKLDIWSFEQVDKQK----AIVLGLTTFLLIFFFYPSPLVLMESHKAALMICK
idopsi  RLVKRMFFDTPRTWILYEPMDRKNK----SLLLAMTSFFITSSLLYPSPLFSVTHQMALSSYL
.pyrif  QNLRFVVKKNKSSILNYKNYYVNIYAI SLNIVLINFNFNFFGILFSDFIILNYISSFLFI
a_ther  QNLRFVVKKNKSSILNYKNYYVNIYSITLNIILLNFFNFFG-IFLSDLIILNYISSYIYI
ettsia  KVVKAMYFSKK---IAIIKLPMQY-----GLLLINYLVLGFLFSGFIILF-----
.aurel  STVKSFVNRKQASVLNSFNFFIRA----ELSFLYFNFFYFFLFFAFFFLDSTFLIFLNLF
E_coli  RVAVSLYLHAFEPGRDAPSNWQYSAG-GIVVLI SALLVLVLGVWFQPLISIVRLAMPLM--
_sapie  RLIYSTSITLLF-MSNNVKKMKWQFEHTKPTPFLPTLIALTLLLPISPFMLMIL-----
8_NAD2  VIASYTITEVPHG-LELLTLNGNT----CSELMSTCCMLLLGSIFLQDTYMFLYNMVL----
ruler  .....460.....470.....480.....490.....500.....510..
```

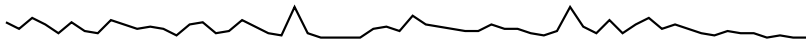

# Fig. S14: CLUSTAL X (1.4b) MULTIPLE SEQUENCE ALIGNMENT

File: /mnt/cammsa20/comics/jagabald/HYDROGENOME/FIRST/NAD4L.ps

Date: Tue Oct 12 18:17:17 2004

Page 1 of 2

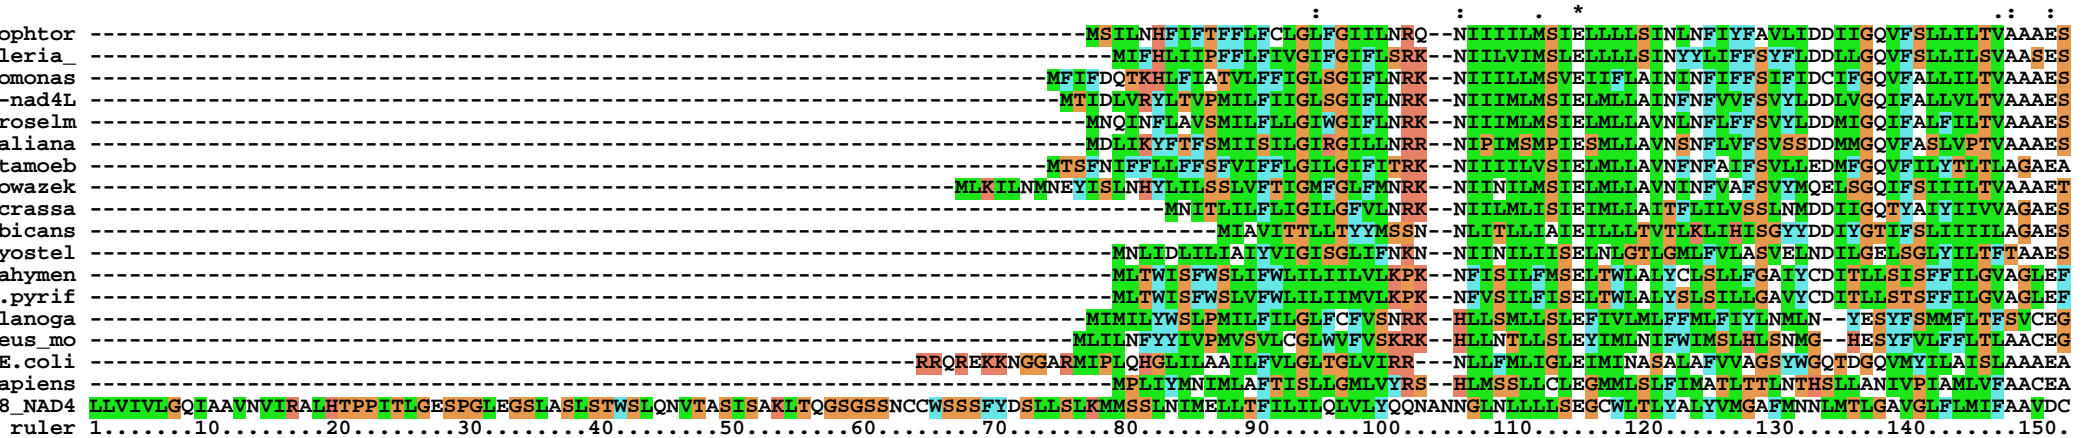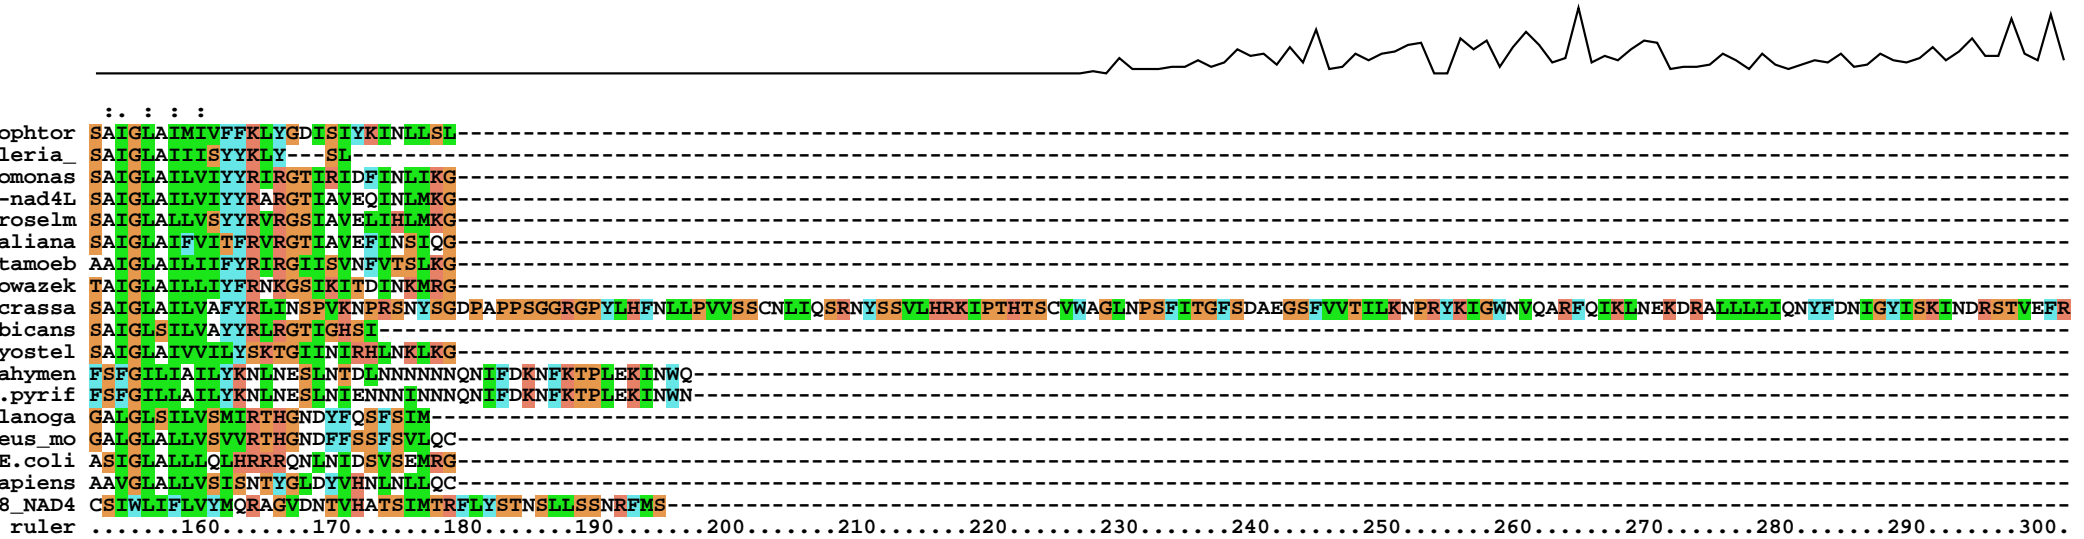

# CLUSTAL X (1.4b) MULTIPLE SEQUENCE ALIGNMENT

File: /mnt/cammsa20/comics/jagabald/HYDROGENOME/FIRST/NAD4L.ps

Date: Tue Oct 12 18:17:17 2004

Page 2 of 2

```
ophtor -----
leria_ -----
omonas -----
-nad4L -----
roselm -----
aliana -----
tamoeb -----
owazek -----
crassa RVSDITSLNNLIIPHFKEYQLINKYGDLVIFKQIVSLMLENKHTTLEGLKELLEHRASLNWGLSKTLKESFPSIIPVKRVKIENNLLSNLSSLPPLPRGGNWVAGFSSGEANFFITMSGTKVWLRFSIAQDSRDILLKSLVKFFNCYI
bicans -----
yostel -----
ahymen -----
.pyrif -----
lanoga -----
eus_mo -----
E.coli -----
apiens -----
8_NAD4 -----
ruler .....310.....320.....330.....340.....350.....360.....370.....380.....390.....400.....410.....420.....430.....440.....450.
```

---

```
ophtor -----
leria_ -----
omonas -----
-nad4L -----
roselm -----
aliana -----
tamoeb -----
owazek -----
crassa LAQYKNRNVCEFIVTKINDIITYIIPFFDQYKLEGSKYNDYVKFKEAALIKNKEHLTEKGLNKITTELNKSLPPPASLEGGMNKNI
bicans -----
yostel -----
ahymen -----
.pyrif -----
lanoga -----
eus_mo -----
E.coli -----
apiens -----
8_NAD4 -----
ruler .....460.....470.....480.....490.....500.....510.....520.....530.....
```

## 5. Supplementary data quinone determination, Fig. S15

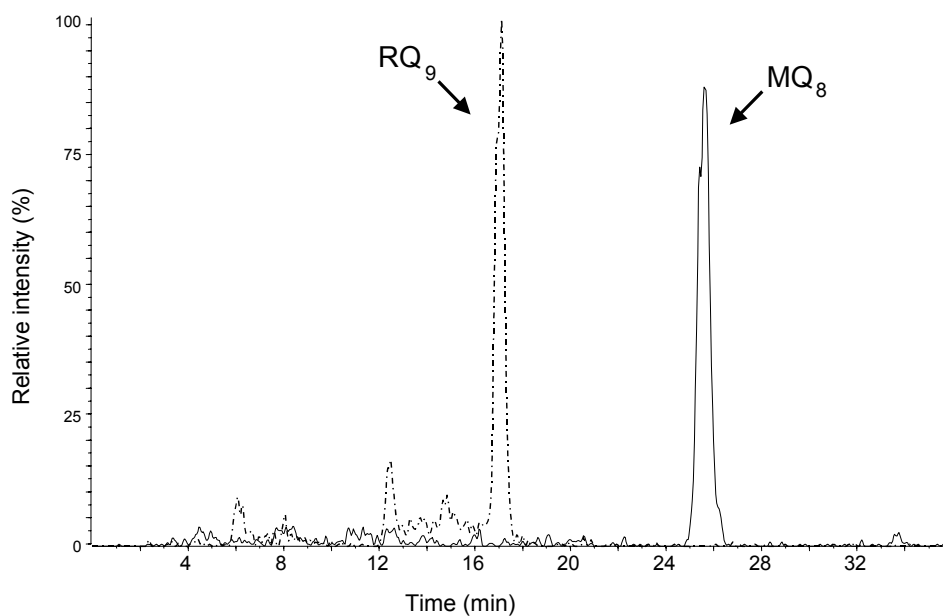

Quinones were separated by liquid chromatography on a Lichrospher RP-18e column and detected by a Sciex API 300 triple quadrupole mass spectrometer with an atmospheric pressure chemical ionisation source as described before (Hoffmeister et al 2004). Quantification of the quinones was performed by selective reaction monitoring taking  $[M+H]^+$  as a precursor ion for ubiquinones (UQ<sub>6 to 10</sub>), rholoquinone (RQ<sub>6 to 10</sub>) and menaquinone (MQ<sub>6 to 8</sub>) and the quinone headgroup as specific product ion ( $m/z$  197.1, 182.1 and 187.1 for UQ, RQ and MQ, respectively). Calibration curves were prepared with quinone standards.

M. Hoffmeister, A. van der Klei, C. Rotte, K.W. A. van Grinsven, J. J. van Hellemond, K. Henze, A. G. M. Tielens and W. Martin, *Euglena gracilis* rholoquinone:ubiquinone ratio and mitochondrial proteome differ under aerobic and anaerobic conditions. *J. Biol. Chem.* 279 (2004) 22422-22429.

## 6. Light microscopy

**Visualization of hydrogenosomes in living *N. ovalis* cells using CLSM.** Mitochondria were stained with Mitotracker green FM<sup>®</sup> (MG; 10 min, 5  $\mu$ M) or Rhodamine-123 (R123; 3 min, 100  $\mu$ M; see Fig. 3 of main text). Rhodamine-123 accumulates in organelles with a highly negative membrane potential (Chen, L. B. *et al.* Probing mitochondria in living cells with Rhodamine 123. *Cold Spring Harbor Symp. Quant. Biol.* **46**, 141–155, 1982). Mitotracker green FM<sup>®</sup> stains the same organelles confirming the presence of a mitochondrial-type of membrane. To confirm the correspondence between the hydrogenosomes identified by electronmicroscopy and immunocytochemistry<sup>15</sup> and the “mitochondria” identified by CLSM, images were recorded on a Noran OZ<sup>®</sup> videorate confocal microscope, realtime averaged at a rate of 30 img/s using a NA 1.4 x60 objective and a confocal section thickness of 3  $\mu$ m (Koopman, W. J. H. *et al.*, Reference 28). Next, images were background corrected and contrast optimized to highlight R123 and MG-positive structures. Methanogenic endosymbionts are much smaller (Fig. 3 of manuscript; ref 19); they do not stain with R123 under these conditions (not shown). (A) The diameter of the fluorescent structures was determined using the width at half maximal amplitude of a Gaussian curve fitted to the intensity profile transecting the centre of each object. (B) This analysis revealed similar object diameters for R123 (AVG $\pm$ SE: 1.59 $\pm$ 0.18  $\mu$ m, n=17 mitochondria) and MG (1.78 $\pm$ 0.18  $\mu$ m, n=17), which matches the size of (fixed and dehydrated) hydrogenosomes identified in the electron micrographs. (C) The addition of DMSO (used to improve the solubility of Rotenone and Fenazaquine) does not hamper the staining of the hydrogenosomes by R123 even at concentrations of 10% v/v. (E) The R123 signal persisted for at least 4 hours after staining. (D) shows the effect of incubation with Fenazaquine (an inhibitor of mitochondrial complex I) on R123 staining, which is the same as Rotenone, Piericidin, and MPP<sup>+</sup>.

Fig. S16 A

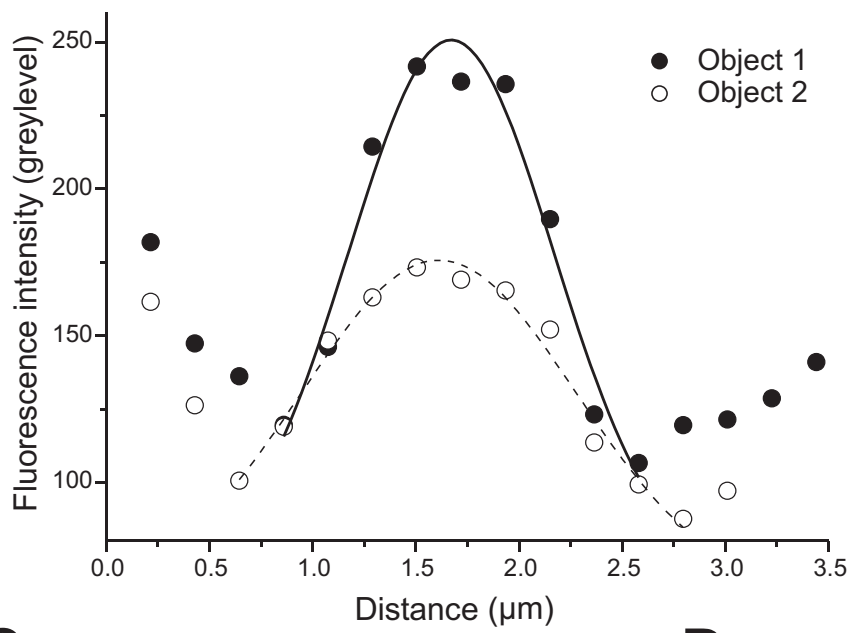

B

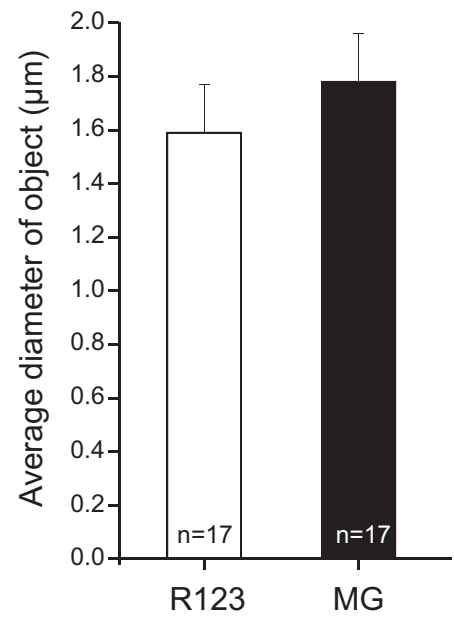

C

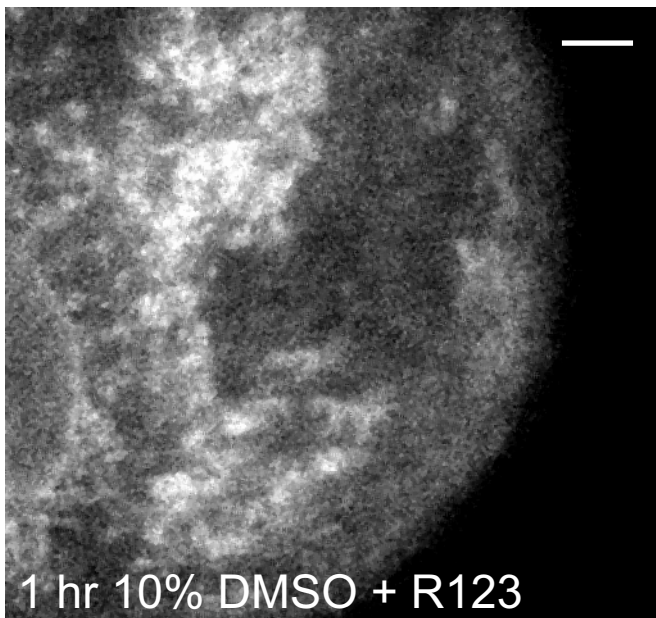

D

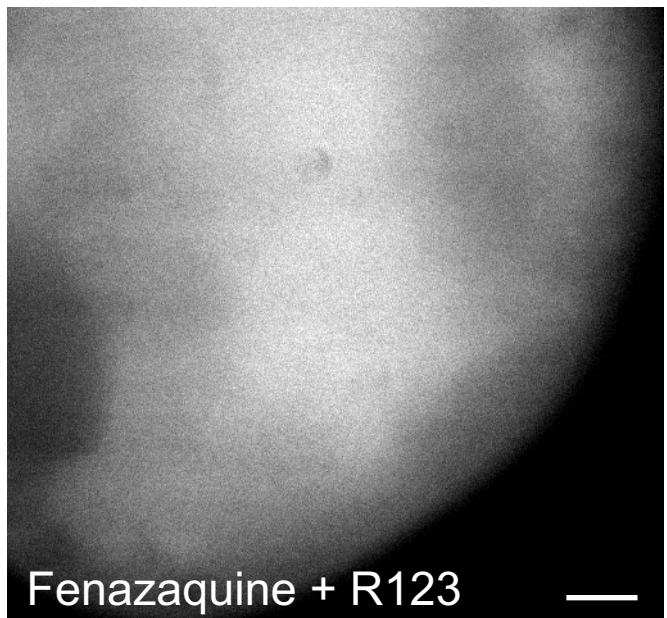

E

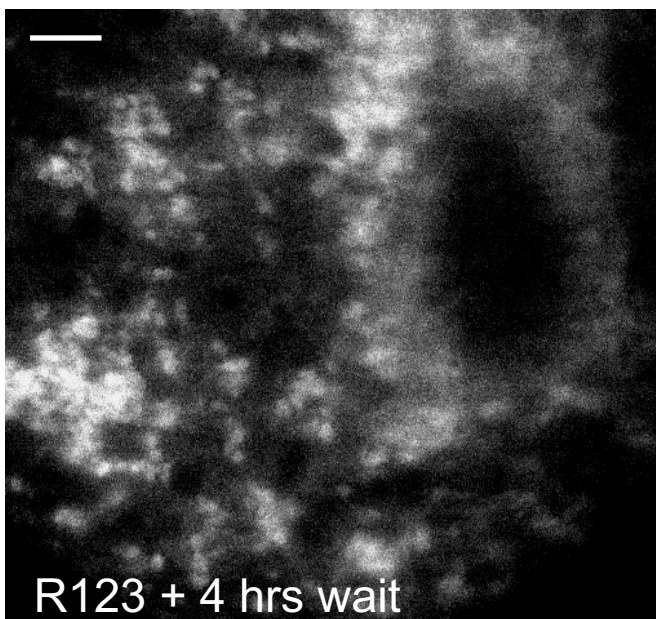

| <b>Table S1: Genes encoding mitochondrial proteins</b>        | <b>clone</b> | <b>match</b>          | <b>e-value</b> | <b>Local</b> | <b>Codon use</b> | <b>cDNA</b> | <b>Target. signal</b> | <b>Accession number</b> |
|---------------------------------------------------------------|--------------|-----------------------|----------------|--------------|------------------|-------------|-----------------------|-------------------------|
| <b>mitochondrial complex I</b>                                |              |                       |                |              |                  |             |                       |                         |
| NAD2                                                          | mtg-1        | mt genome Tetrahymena | 3.00E-04       | H            | Mt               |             | no                    | AJ871267                |
| NAD4 L                                                        | mtg-1        | mt genome Tetrahymena | 0.2            | H            | Mt               |             | no                    | AJ871267                |
| NAD5                                                          | mtg-1        | mt genome Tetrahymena | 8.00E-59       | H            | Mt               | Y           | no                    | AJ871267                |
| NAD7                                                          | mtg-1        | mt genome Tetrahymena | 2.00E-90       | H            | Mt               | Y           | no                    | AJ871267                |
| 24kD                                                          |              | Hsa-IPI00018770.2     | 8.00E-54       | N            | Nuc              |             | Y                     | AY628688                |
| 51kD                                                          |              | Hsa-IPI00028520.2     | 1.00E-178      | N            | Nuc              | Y           | Y                     | AY608632                |
| 75kD                                                          |              | Hsa-IPI00002871.1     | 1.00E-28       | N            | Nuc              |             | Y                     | *****                   |
| <b>mitochondrial complex II</b>                               |              |                       |                |              |                  |             |                       |                         |
| SDH a                                                         |              | YJL045W               | 0              | N            | Nuc              | Y           | Y                     | AY616152                |
| SDH b                                                         |              | Hsa-IPI00011216.2     | 2.00E-80       | N            | Nuc              | Y           | Y                     | AY619980                |
| <b>mt protein synthesis</b>                                   |              |                       |                |              |                  |             |                       |                         |
| Putative ribosomal RNA methyltransferase 2                    | HK530_1      | Hsa-IPI00006026.1     | 3.00E-36       | N            | Nuc              |             |                       | AJ871313                |
| <b>mt ribosomal proteins</b>                                  |              |                       |                |              |                  |             |                       |                         |
| RPL 2                                                         | mtg-1        | mt genome Tetrahymena | 4.00E-11       | H            | Mt               |             |                       | AJ871267                |
| RPL 14                                                        | mtg-1        | mt genome Tetrahymena | 0.052          | H            | Mt               |             |                       | AJ871267                |
| RPL 20                                                        | HK2972_2     | Hsa-IPI00013706.1     | 1.00E-13       | N            | Nuc              |             | ?                     | AJ871314                |
| <b>mt tRNA</b>                                                |              |                       |                |              |                  |             |                       |                         |
| tRNA tyrosine                                                 | mtg-1        |                       |                | H            | rna              |             |                       | AJ871267                |
| <b>mt rRNA</b>                                                |              |                       |                |              |                  |             |                       |                         |
| 12S rDNA (SSU)                                                | mtg-1        |                       |                | H            | rna              |             |                       | AJ871267                |
| <b>mt catabolism/energy metabolism</b>                        |              |                       |                |              |                  |             |                       |                         |
| PDH E1a                                                       |              | Hsa-IPI00029237.1     | 1.00E-102      | N            | Nuc              | Y           | Y                     | AY623917                |
| PDH E1b                                                       |              | Hsa-IPI00003925.1     | 1.00E-119      | N            | Nuc              | Y           | Y                     | AY628683                |
| PDH E2                                                        |              | Hsa-IPI00021338.1     | 1.00E-105      | N            | Nuc              | Y           | Y                     | AY623925                |
| [Fe] Hydrogenase                                              |              |                       |                | N            | Nuc              | Y           | Y                     | AY608627                |
| Acetyl-coenzyme A synthetase 2 (EC 6.2.1.1)                   | HK700_2      | Sce-ACS2_YEAST        | 5.00E-34       | N            | Nuc              |             | no                    | AJ871315                |
| Adenylate kinase 2 (EC 2.7.4.3)                               | HK2418_2     | Sce-KAD2_YEAST        | 2.00E-20       | N            | Nuc              |             | no                    | AJ871316                |
| adenylate kinase 2 isoform c =HK2418                          | HK2589_0     | Hsa-IPI00172460.1     | 4.00E-19       | N            | Nuc              |             |                       | AJ871317                |
| Probable D-lactate dehydrogenase [cytochrome] (EC 1.1.2.4)    | HK865_2      | Sce-DLD3_YEAST        | 3.00E-38       | N            | Nuc              |             | Y                     | AJ871318                |
| succinyl-CoA ligase                                           | HK 088       | Sce-SUCB_YEAST        | 5.00E-42       | N            | Nuc              |             | Y                     | AJ871319                |
| Succinyl-CoA:3-ketoacid-coenzyme A transferase, mitochondrial | HK1860_2     | Hsa-IPI00026516.1     | 2.00E-52       | N            | Nuc              |             | Y                     | AJ871320                |
| Glycerol kinase                                               | HK1998_0     | Hsa-IPI00027424.1     | 7.00E-38       | N            | Nuc              |             | C                     | AJ871321                |
| <b>mt carrier family</b>                                      |              |                       |                |              |                  |             |                       |                         |
| AAC                                                           |              | Hsa-IPI00022891.1     | 1.00E-100      | N            | Nuc              |             | no                    | AF480921                |
| Putative mitochondrial carrier protein PET8 YNL003C_Chr       | HK197_2      | Sce-PET8_YEAST        | 0.001          | N            | Nuc              |             | no                    | AJ871322                |
| <b>mt import/processing</b>                                   |              |                       |                |              |                  |             |                       |                         |
| Mitochondrial processing peptidase alpha subunit              | HK2671       | Sce-MPPA_YEAST        | 2.00E-19       | N            | Nuc              |             | ?                     | AJ871323                |



|                                                                |          |                   |          |   |     |  |    |          |
|----------------------------------------------------------------|----------|-------------------|----------|---|-----|--|----|----------|
| HSP 60                                                         | HK1444   |                   |          | N | Nuc |  | Y  | AJ871324 |
| HSP 70                                                         | HK2256   |                   |          | N | Nuc |  | no | AJ871325 |
| Heat shock protein HSP82 YMR186W_Chr                           | HK1228_1 | Sce-HS82_YEAST    | 4.00E-77 | N | Nuc |  | no | AJ871326 |
| TOM 34                                                         | HK1184_2 | Hsa-IPI00009946.2 | 1.00E-22 | N | Nuc |  | no | AJ871327 |
| Mitochondrial protein import protein MAS5 (Protein YDJ1)       | HK087_0  | Sce-MAS5_YEAST    | 2.00E-20 | N | Nuc |  | C  | AJ871328 |
| Stress-70 protein, mitochondrial precursor                     | HK2165_0 | Hsa-IPI00007765.2 | 2.00E-43 | N | Nuc |  | C  | AJ871329 |
| <b>amino acid metabolism</b>                                   |          |                   |          |   |     |  |    |          |
| Branched-chain amino acid aminotransferase, mitochondrial      | HK118_0  | Sce-BCA1_YEAST    | 8.00E-20 | N | Nuc |  | no | AJ871330 |
| Putative alanine aminotransferase, mitochondrial precursor     | HK1384_1 | Sce-ALAM_YEAST    | 3.00E-48 | N | Nuc |  | C  | AJ871331 |
| Glutamate dehydrogenase 2, mitochondrial precursor             | HK1446_1 | Hsa-IPI00027146.1 | 6.00E-60 | N | Nuc |  | ?  | AJ871332 |
| Cystathionine beta-synthase (EC 4.2.1.22)                      | HK1495_2 | Sce-CBS_YEAST     | 3.00E-41 | N | Nuc |  | no | AJ871333 |
| Serine hydroxymethyltransferase, mitochondrial precursor       | HK1649_1 | Hsa-IPI00002520.1 | 1.00E-74 | N | Nuc |  | ?  | AJ871334 |
| Saccharopepsin precursor (EC 3.4.23.25)                        | HK453_2  | Sce-CARP_YEAST    | 0.007    | N | Nuc |  | C  | AJ871335 |
| <b>fatty acid metabolism</b>                                   |          |                   |          |   |     |  |    |          |
| Propionyl-CoA carboxylase alpha chain, mitochondrial precursor | HK1083   | Hsa-IPI00007245.1 | 1.00E-68 | N | Nuc |  | Y  | AJ871336 |
| Long-chain-fatty-acid--CoA ligase 1 (EC 6.2.1.3)               | HK1758_1 | Hsa-IPI00013161.1 | 8.00E-17 | N | Nuc |  | ?  | AJ871337 |
| <b>miscellaneous</b>                                           |          |                   |          |   |     |  |    |          |
| Ubiquitin--protein ligase RSP5 (EC 6.3.2.-)                    | HK1235_0 | Sce-RSP5_YEAST    | 3.00E-29 | N | Nuc |  | C  | AJ871338 |
| Hypothetical 50.6 kDa protein in RPL14B-GPA1 intergenic        | HK1300_0 | Sce-YHG4_YEAST    | 2.00E-18 | N | Nuc |  | C  | AJ871339 |
| P68-like protein YNL112W_Chr                                   | HK1426_2 | Sce-DBP2_YEAST    | 4.00E-16 | N | Nuc |  | ?  | AJ871340 |
| Probable alpha-glucosidase YJL216C (EC 3.2.1.20)               | HK1471_0 | Sce-MAXS_YEAST    | 2.00E-09 | N | Nuc |  | no | AJ871341 |
| Kinesin heavy chain                                            | HK1504_2 | Hsa-IPI00012837.1 | 1.00E-51 | N | Nuc |  | Y  | AJ871342 |
| Dynamin-related protein DNM1 (EC 3.6.1.50)                     | HK1679_1 | Sce-DNM1_YEAST    | 7.00E-04 | N | Nuc |  | C  | AJ871343 |
| Protein phosphatase 2C gamma isoform                           | HK044_0  | Hsa-IPI00006167.1 | 6.00E-26 | N | Nuc |  | no | AJ871344 |
| Protein-tyrosine phosphatase 1 (EC 3.1.3.48)                   | HK195_0  | Sce-PTP1_YEAST    | 3.00E-06 | N | Nuc |  | C  | AJ871345 |
| Mitogen-activated protein kinase FUS3 (EC 2.7.1.37)            | HK025_1  | Sce-FUS3_YEAST    | 8.00E-54 | N | Nuc |  | no | AJ871346 |
| Protein disulfide isomerase precursor                          | HK1749_2 | Hsa-IPI00010796.1 | 2.00E-32 | N | Nuc |  | no | AJ871347 |
| Carbon catabolite derepressing protein kinase (EC 2.7.1.-)     | HK1831_0 | Sce-SNF1_YEAST    | 2.00E-67 | N | Nuc |  | no | AJ871348 |
| Peptidyl-prolyl cis-trans isomerase C, mitochondrial           | HK2173_0 | Sce-CYPC_YEAST    | 3.00E-20 | N | Nuc |  | C  | AJ871349 |
| Chromosome XVI reading frame ORF YPL249C                       | HK2221_0 | Sce-Q12344        | 0.009    | N | Nuc |  | C  | AJ871350 |
| Adenylate cyclase (EC 4.6.1.1) (ATP pyrophosphate-lyase)       | HK2231_0 | Sce-CYAA_YEAST    | 1.00E-10 | N | Nuc |  | no | AJ871351 |
| Ras-related protein SEC4                                       | HK2488_0 | Sce-SEC4_YEAST    | 2.00E-34 | N | Nuc |  | C  | AJ871352 |
| mouse MPV17 protein                                            | HK2632_0 | Sce-Q06563        | 2.00E-21 | N | Nuc |  | no | AJ871353 |
| Prohibitin                                                     | HK2676_2 | Hsa-IPI00017334.1 | 2.00E-52 | N | Nuc |  | Y  | AJ871354 |
| Hypothetical 34.9 kDa protein in SMI1-PHO81 intergenic         | HK2676_2 | Sce-YG4W_YEAST    | 2.00E-44 | N | Nuc |  | Y  | AJ871354 |
| Ubiquitin YKR094C_Chr                                          | HK2854_1 | Sce-UBIQ_YEAST    | 2.00E-35 | N | Nuc |  | C  | AJ871355 |
| Protein C21orf2                                                | HK2943_2 | Hsa-IPI00014472.  | 2.00E-32 | N | Nuc |  | no | AJ871356 |
| YME1 protein (EC 3.4.24.-) (TAT-binding homolog 11)            | HK307_1  | Sce-YME1_YEAST    | 1.00E-33 | N | Nuc |  | C  | AJ871357 |
| Serine/threonine protein phosphatase 2A, catalytic subunit     | HK316_1  | Hsa-IPI00008380.1 | 7.00E-78 | N | Nuc |  | no | AJ871358 |
| GTP-binding protein YPT1 (Protein YP2)                         | HK473_1  | Sce-YPT1_YEAST    | 2.00E-38 | N | Nuc |  | no | AJ871359 |
| ATP-dependent metalloprotease YME1L                            | HK900_1  | Hsa-IPI00099529.1 | 9.00E-35 | N | Nuc |  | C  | AJ871360 |

|                                                                     |         |                |          |   |     |  |   |          |
|---------------------------------------------------------------------|---------|----------------|----------|---|-----|--|---|----------|
| Midasin (MIDAS-containing protein)                                  | HK971_0 | Sce-MDN1_YEAST | 3.00E-14 | N | Nuc |  | ? | AJ871361 |
|                                                                     |         |                |          |   |     |  |   |          |
| C: partial sequence (C-terminus), no N-terminus yet                 |         |                |          |   |     |  |   |          |
| ?: low probability, potential intron around start codon             |         |                |          |   |     |  |   |          |
| nucleus ; H: hydrogenosome; Y: yes; Nuc: nuclear; mt: mitochondrial |         |                |          |   |     |  |   |          |
| mtg-1: 12 kb clone of hydrogenosomal genome                         |         |                |          |   |     |  |   |          |
